# Supplementary material for: A Mobile Lifestyle Management Program (GlycoLeap) for People With Type 2 Diabetes: Single-Arm Feasibility Study
Source: PubMed Central journal article supplement (PMC6555118; doi:10.2196/12965), 2019-05-24
Supplement: mhealth_v7i5e12965_app3.pdf [file mhealth_v7i5e12965_app3.pdf]

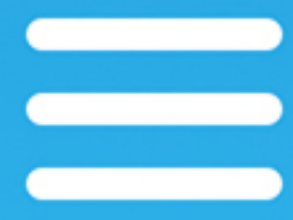

# Weight

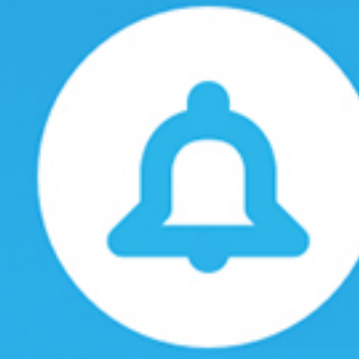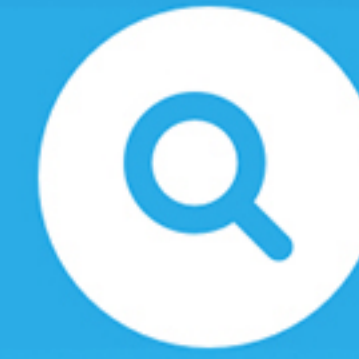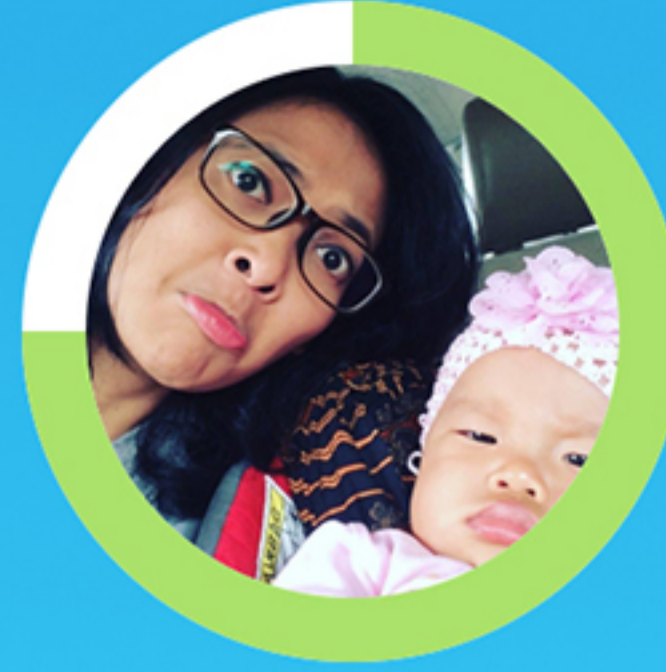

CURRENT

# 87.3

KG

START

# 90.3

KG

GOAL

# 72.0

KG

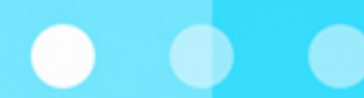

ALL

FOOD

GLUCOSE

WEIGHT

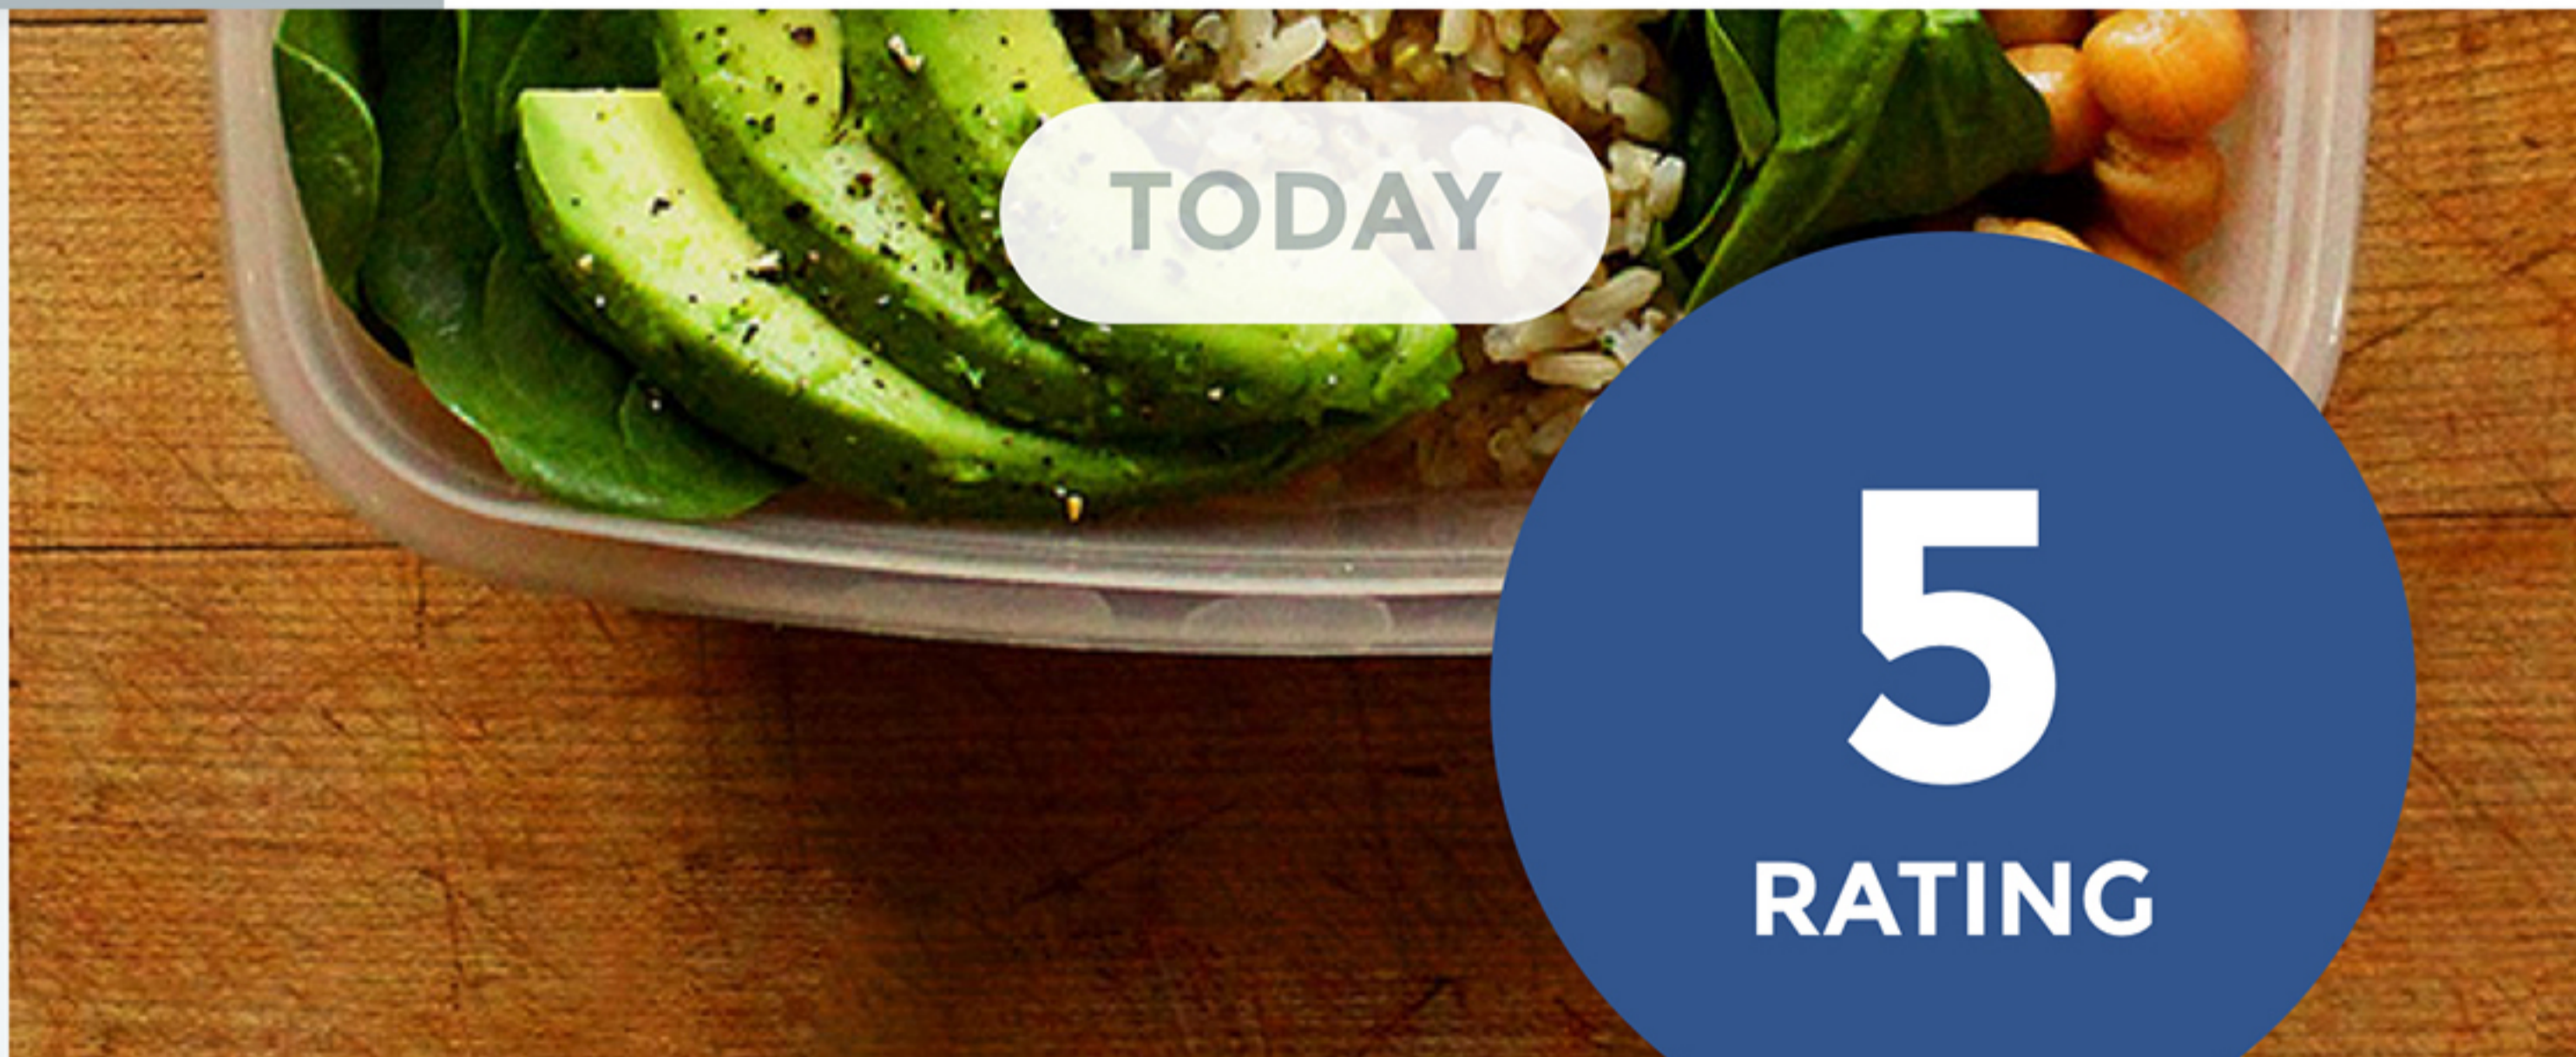

TODAY

# 5

RATING

## brown Rice, peas, spin..

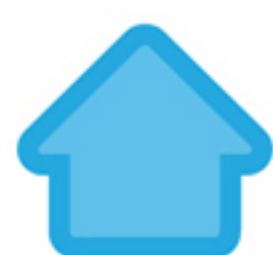

Feed

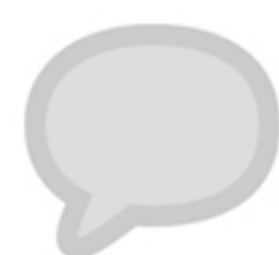

Ask Coach

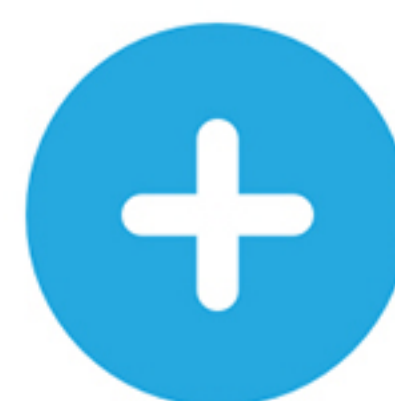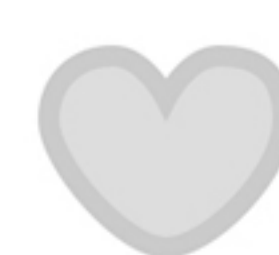

Insight

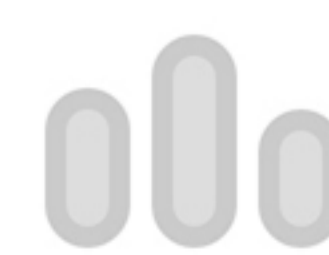

Progress
