# Supplementary material for: A Mobile Lifestyle Management Program (GlycoLeap) for People With Type 2 Diabetes: Single-Arm Feasibility Study
Source: PubMed Central journal article supplement (PMC6555118; doi:10.2196/12965), 2019-05-24
Supplement: mhealth_v7i5e12965_app4.pdf [file mhealth_v7i5e12965_app4.pdf]

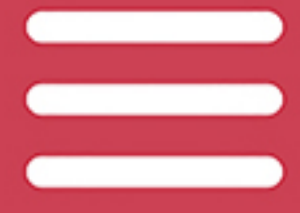

# Progress

Glucose

Weight

Activity

Yesterday, 09 Feb '17

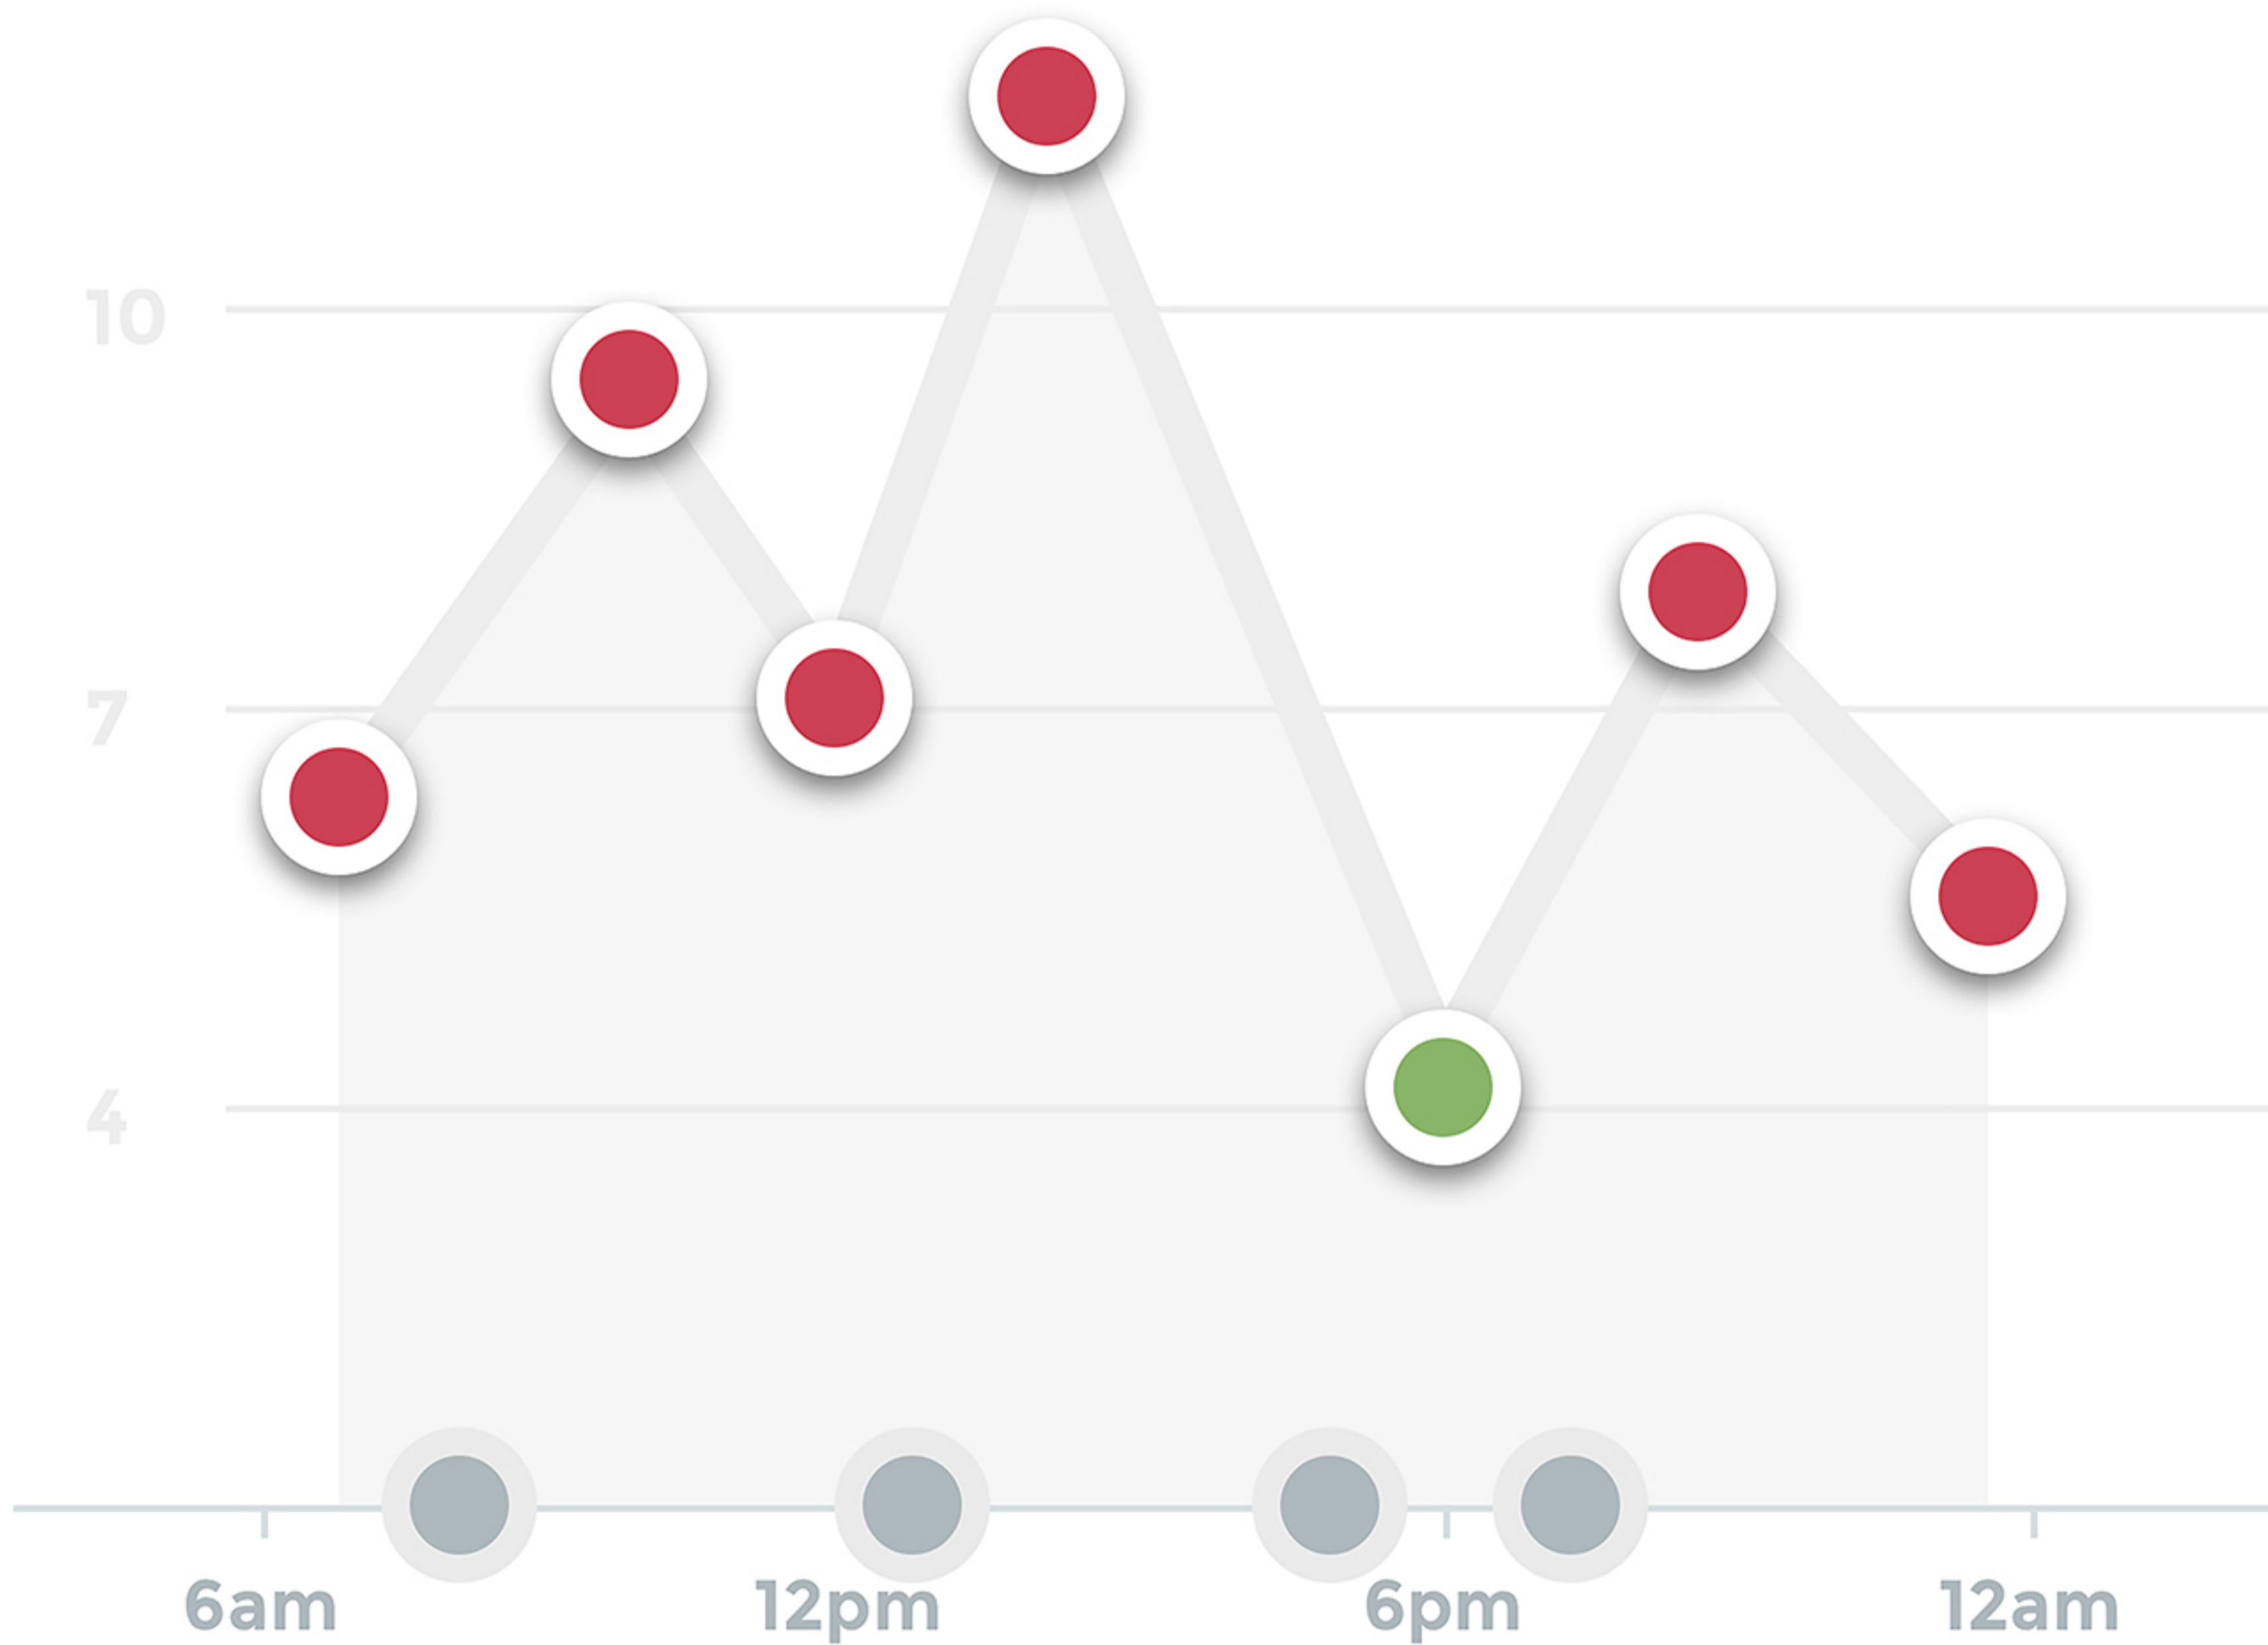

TODAY  
AVERAGE

**5.3**

MMOL/L

LAST 7 DAYS  
AVERAGE

**12.9**

MMOL/L

LAST 30 DAYS  
AVERAGE

**7.4**

MMOL/L

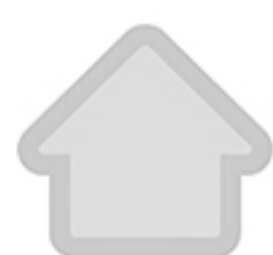

Feed

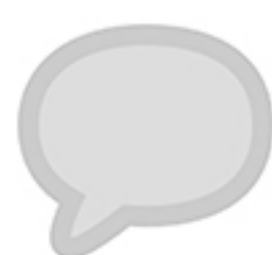

Ask Coach

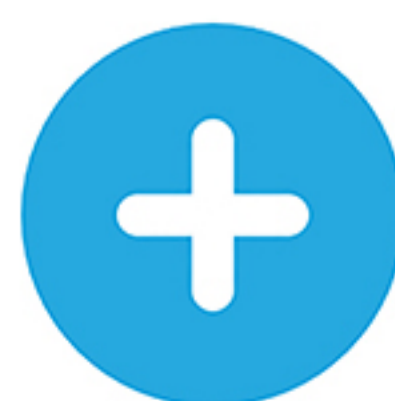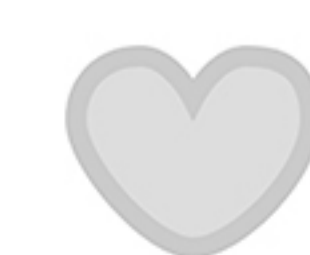

Insight

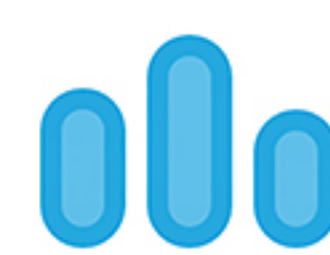

Progress
