# Supplementary material for: A Mobile Lifestyle Management Program (GlycoLeap) for People With Type 2 Diabetes: Single-Arm Feasibility Study
Source: PubMed Central journal article supplement (PMC6555118; doi:10.2196/12965), 2019-05-24
Supplement: mhealth_v7i5e12965_app5.pdf [file mhealth_v7i5e12965_app5.pdf]

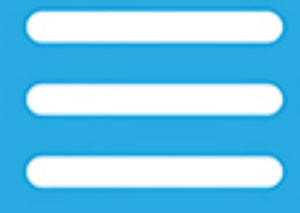

# Progress

Glucose

**Weight**

Activity

## This Week

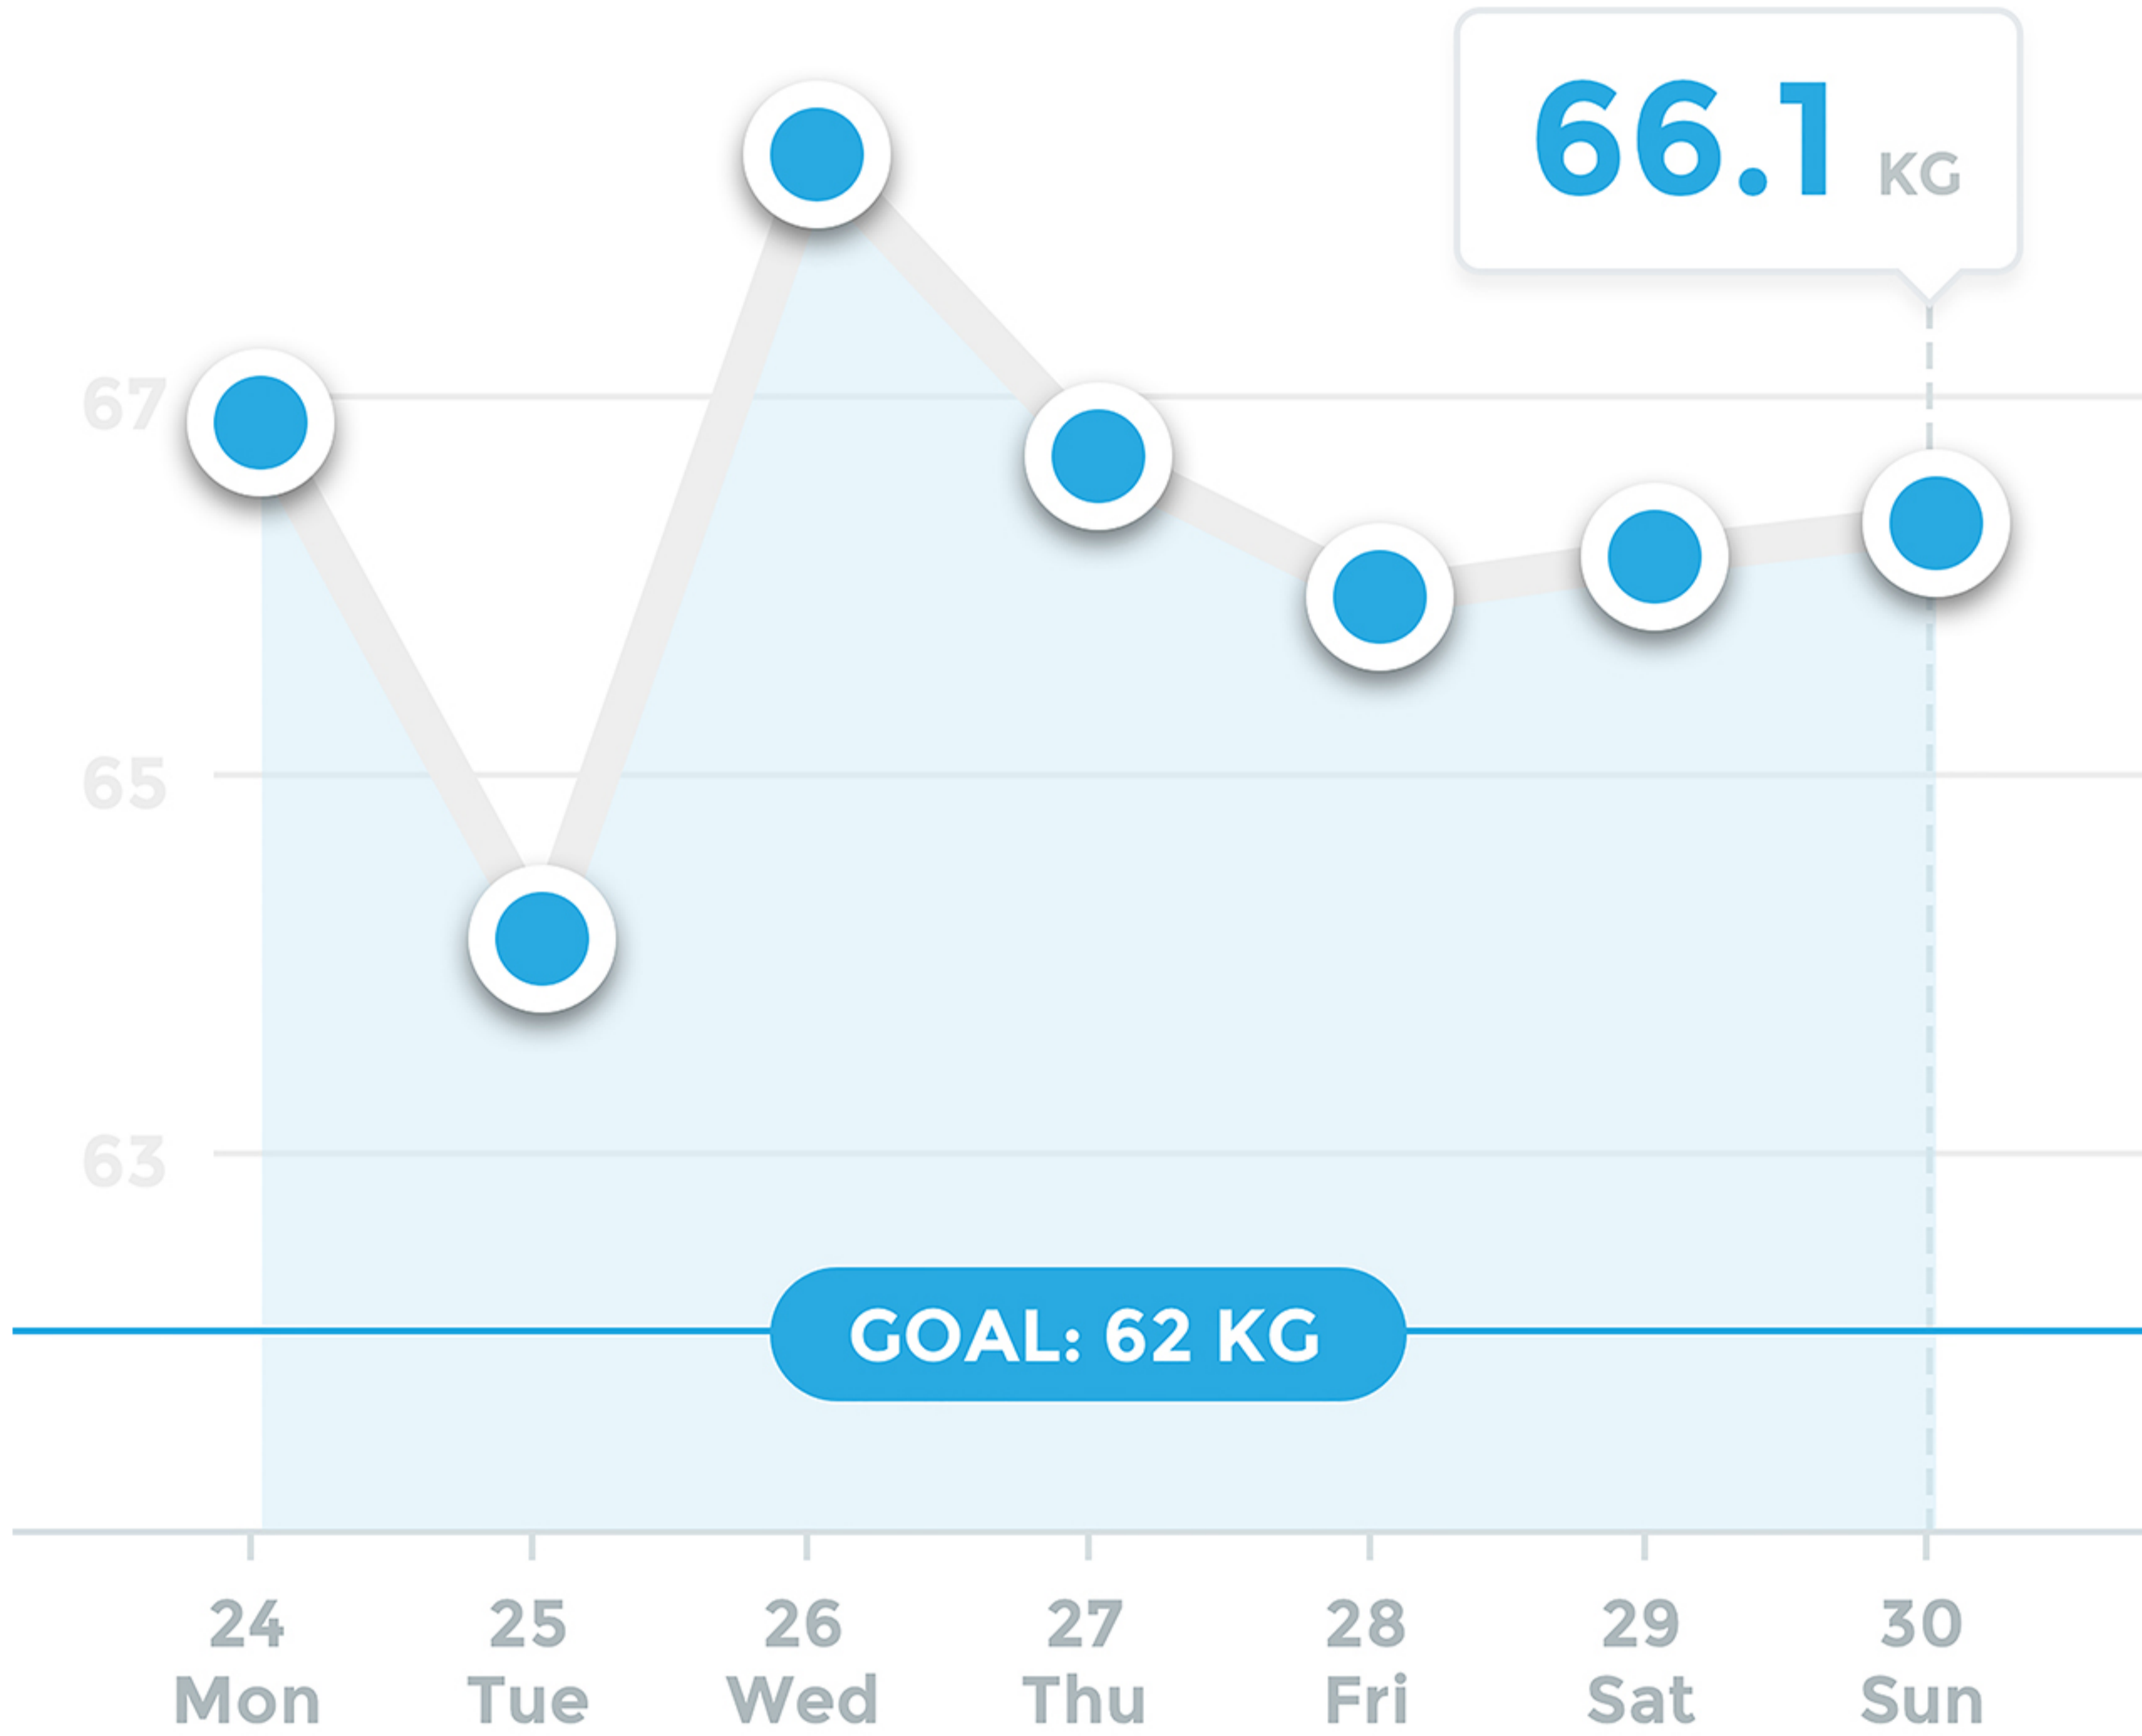

BMI

**8.3**

KG/M2

WEIGH-INS

**3.1**

KG

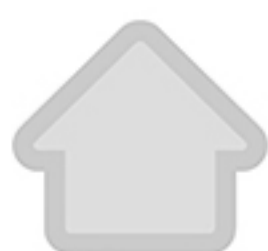

Feed

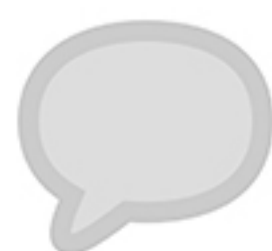

Ask Coach

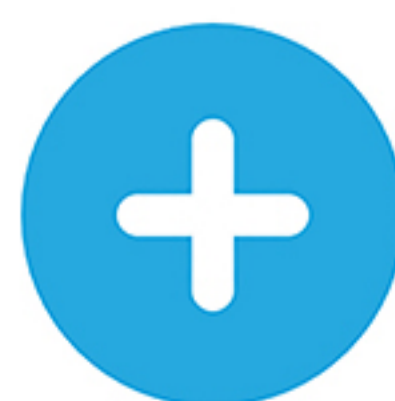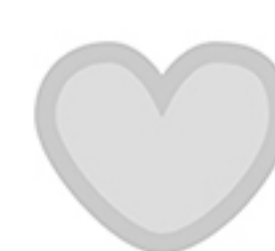

Insight

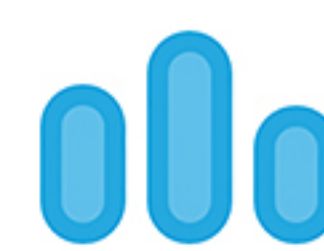

Progress
