# Supplementary material for: A Mobile Lifestyle Management Program (GlycoLeap) for People With Type 2 Diabetes: Single-Arm Feasibility Study
Source: PubMed Central journal article supplement (PMC6555118; doi:10.2196/12965), 2019-05-24
Supplement: mhealth_v7i5e12965_app6.pdf [file mhealth_v7i5e12965_app6.pdf]

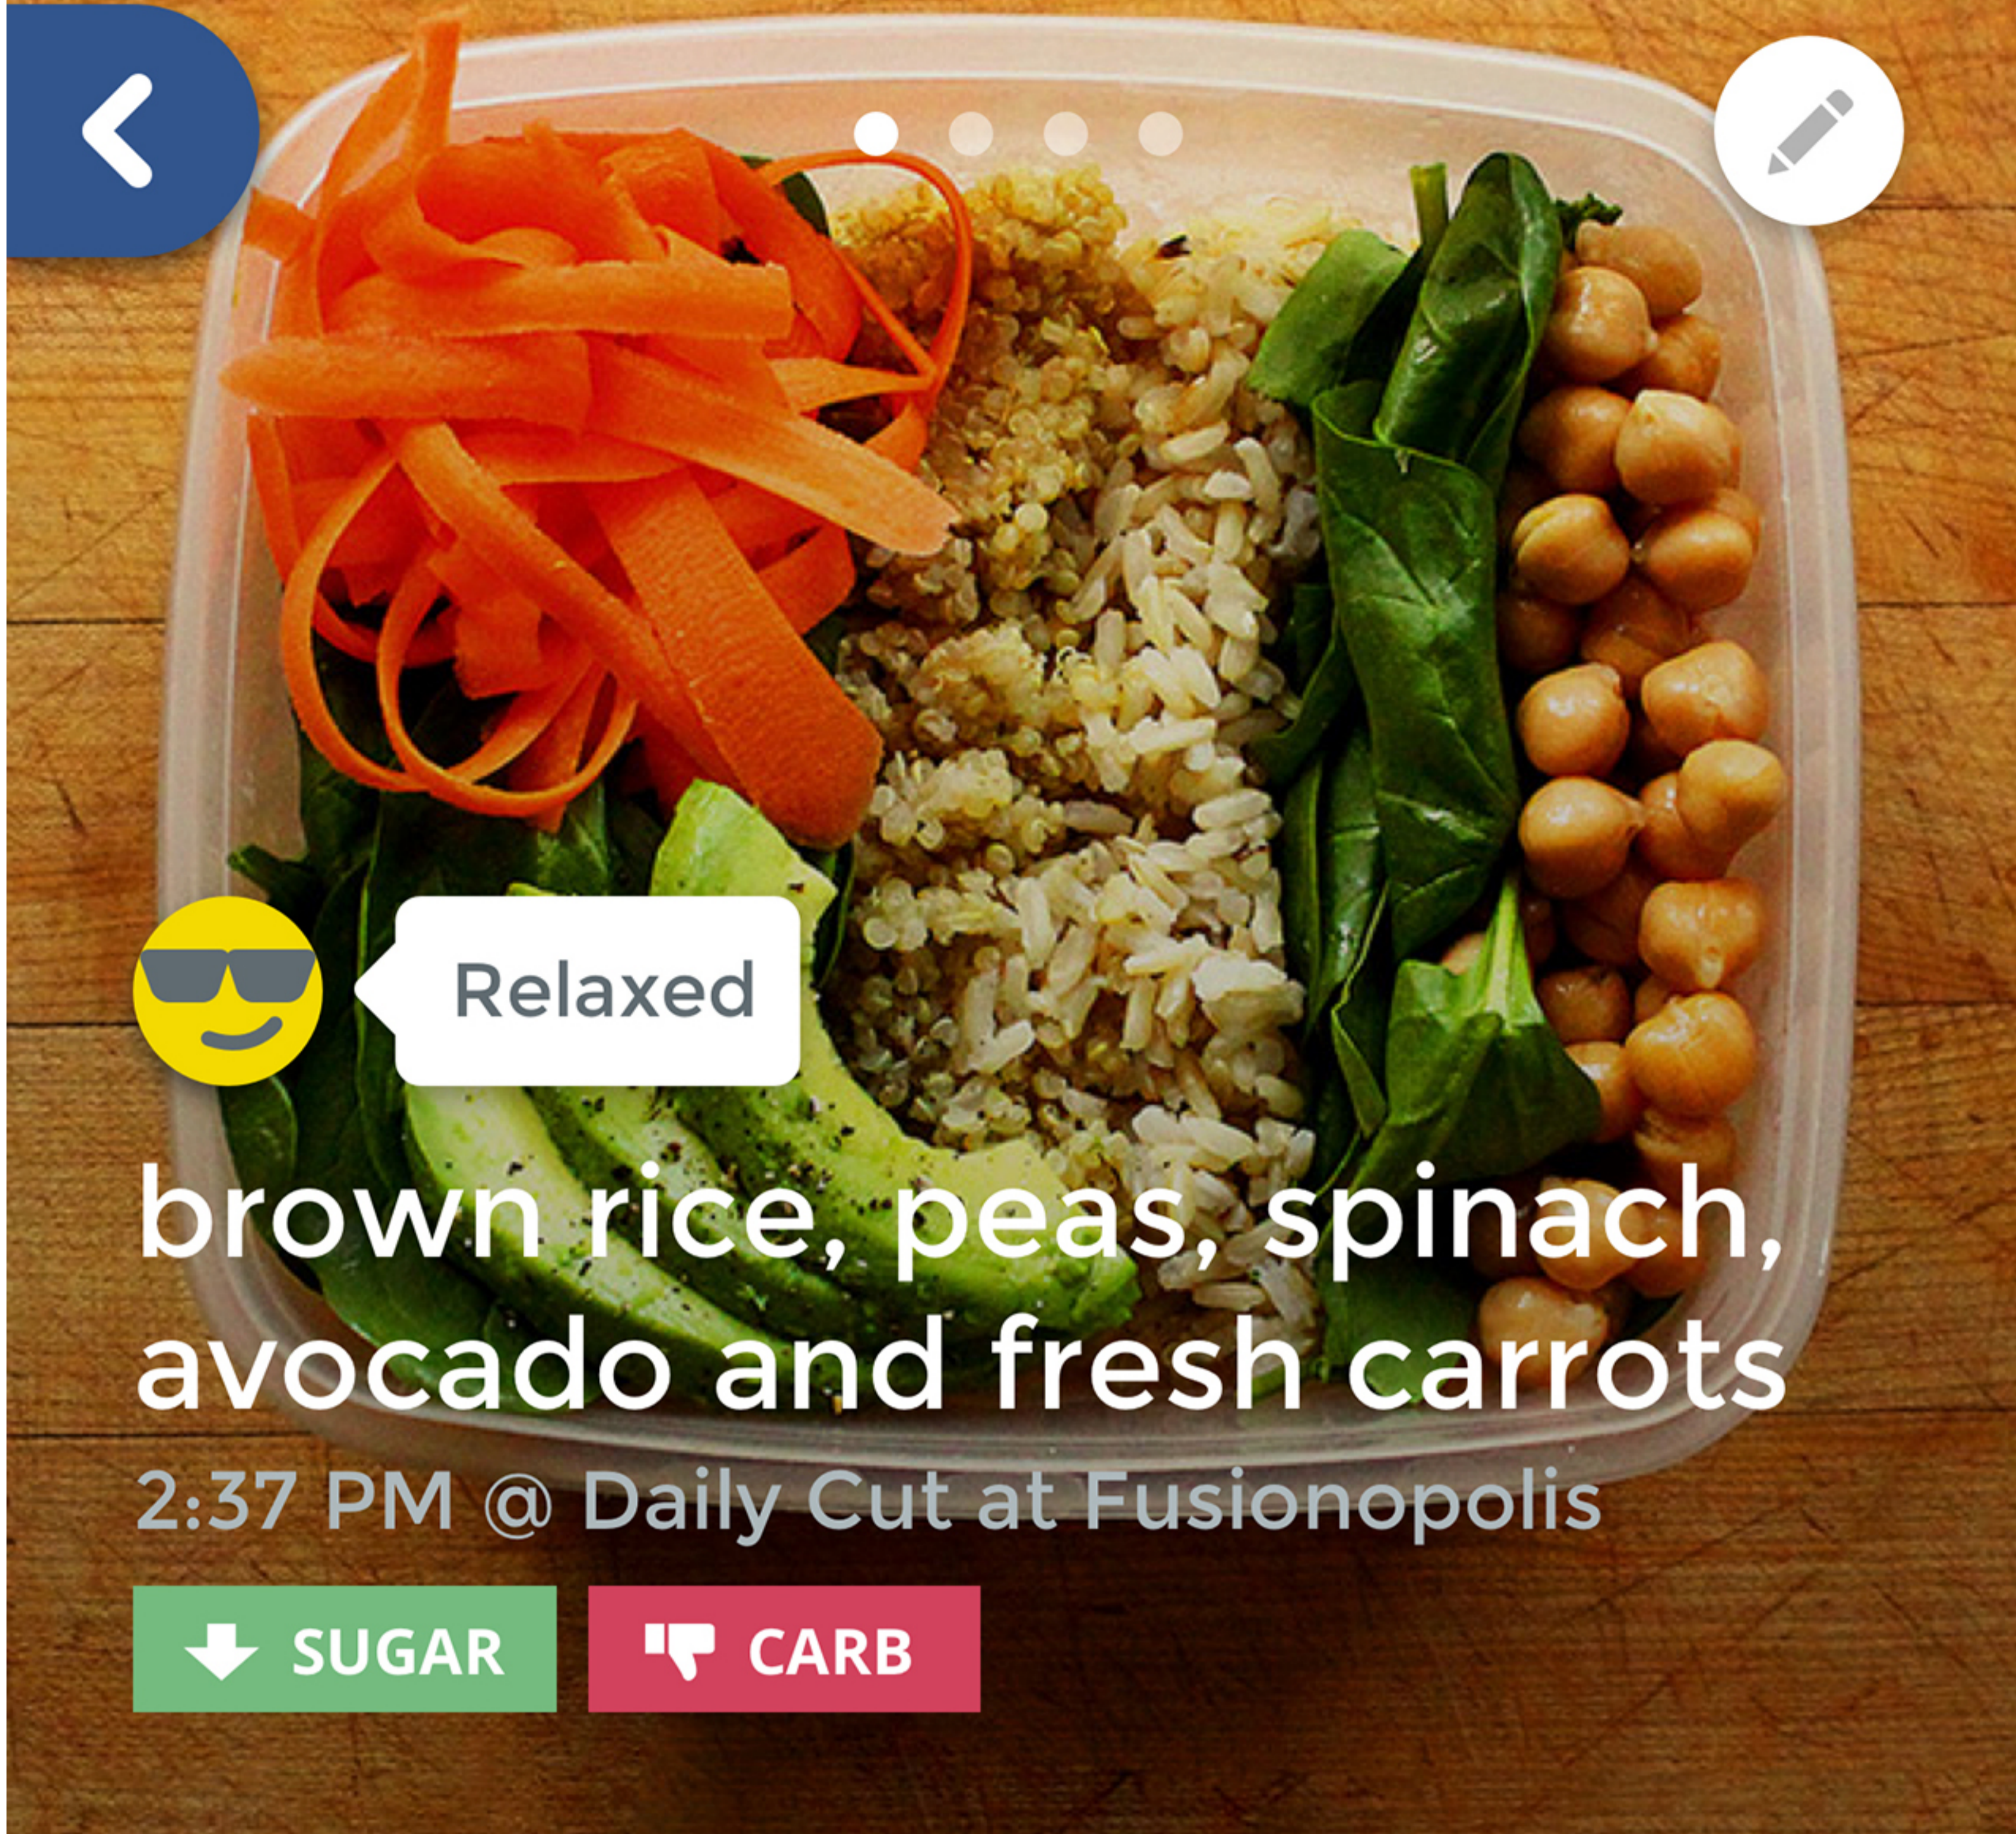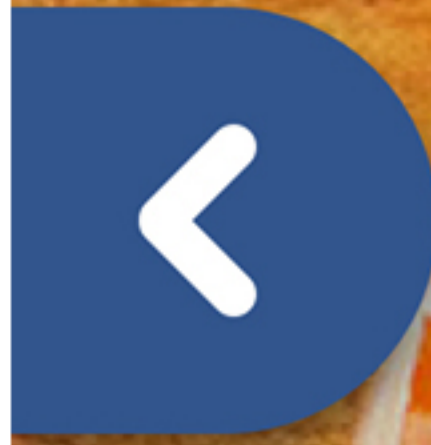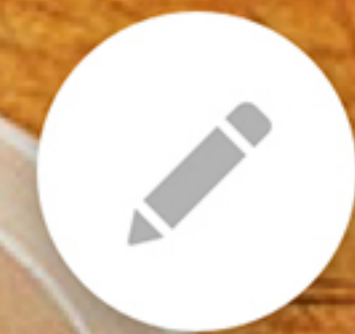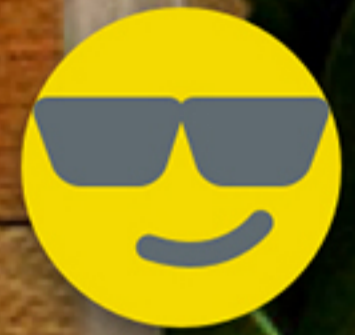

Relaxed

brown rice, peas, spinach, avocado and fresh carrots

2:37 PM @ Daily Cut at Fusionopolis

↓ SUGAR

👎 CARB

BEFORE

5.3

MMOL/L

5  
RATING

AFTER

6.8

ADD GLUCOSE

TODAY

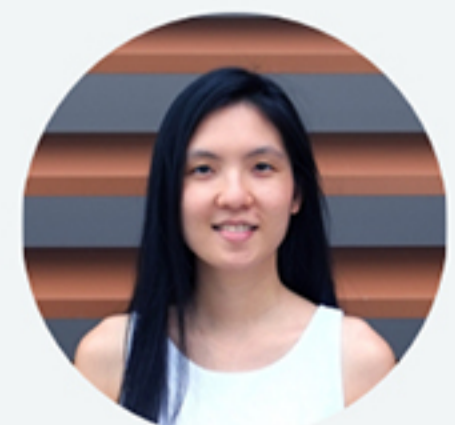

Thanks for your food log!

2:37 PM

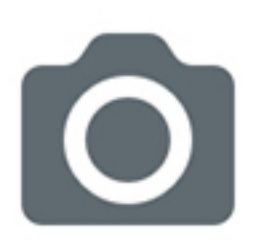

Add a comment
