# Supplementary material for: A Mobile Lifestyle Management Program (GlycoLeap) for People With Type 2 Diabetes: Single-Arm Feasibility Study
Source: PubMed Central journal article supplement (PMC6555118; doi:10.2196/12965), 2019-05-24
Supplement: mhealth_v7i5e12965_app7.pdf [file mhealth_v7i5e12965_app7.pdf]

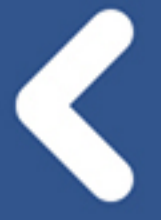

brown rice, peas, spinach,  
avocado and fresh carrots

TODAY

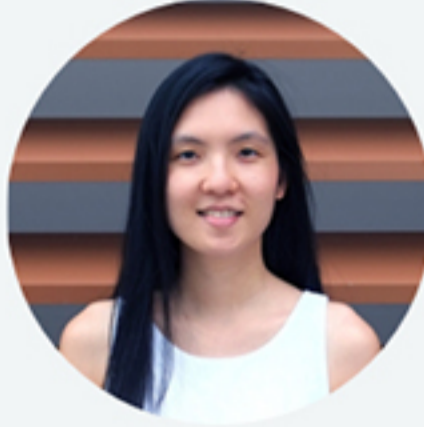

Thanks for your food log!

2:37 PM

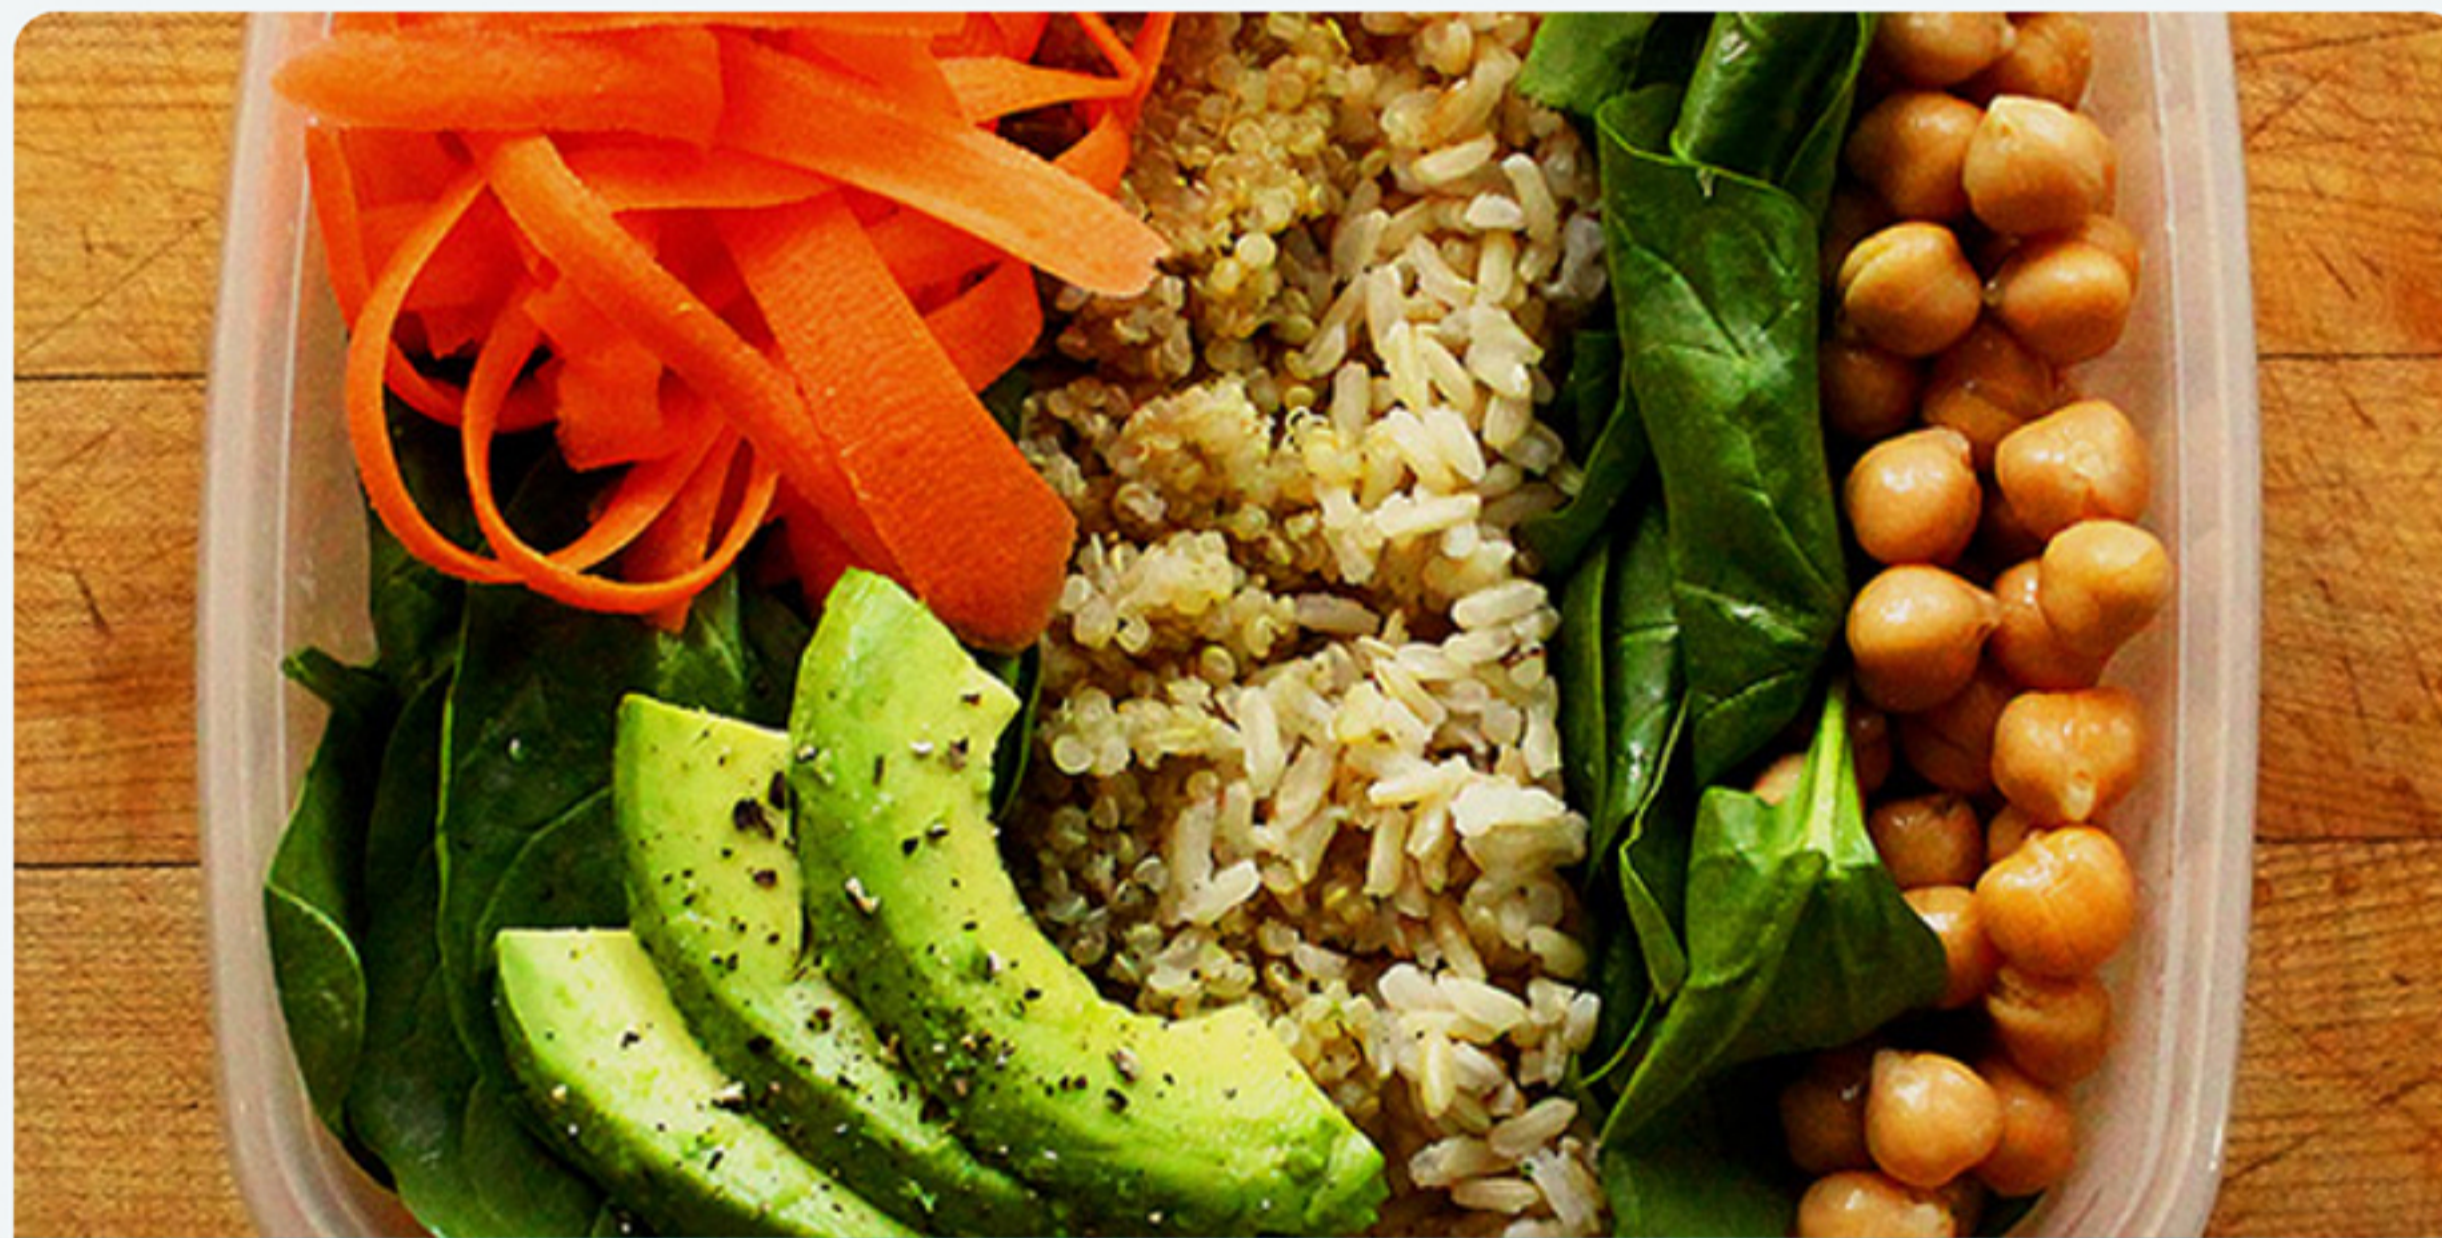

Yes I took the skin off!

4:52 PM

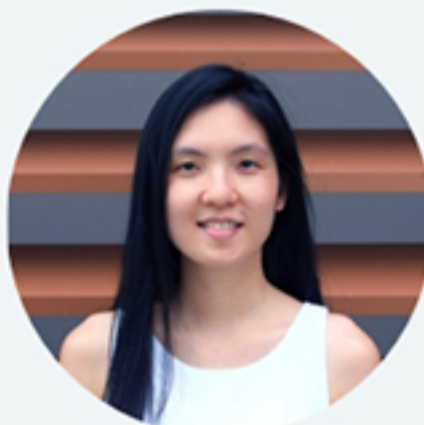

You're a champion! 👍

5:02 PM

But I also had corn. Not sure  
how much more I could take.

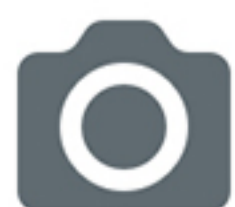

Add a comment
