# Supplementary material for: A Mobile Lifestyle Management Program (GlycoLeap) for People With Type 2 Diabetes: Single-Arm Feasibility Study
Source: PubMed Central journal article supplement (PMC6555118; doi:10.2196/12965), 2019-05-24
Supplement: mhealth_v7i5e12965_app8.pdf [file mhealth_v7i5e12965_app8.pdf]

| Change in HbA1c         |                      |
|-------------------------|----------------------|
|                         | Completes            |
| Health Lessons          | -0.180<br>(0.373)    |
| Glucose Logs            | 0.416<br>(0.503)     |
| Weight Logs             | -0.995**<br>(0.356)  |
| Meal Logs               | -0.988<br>(0.555)    |
| Health Coach Messages   | -0.108<br>(0.473)    |
| Baseline HbA1c          | -0.822***<br>(0.105) |
| Age                     | -0.017<br>(0.017)    |
| Male                    | -0.035<br>(0.310)    |
| Chinese                 | -0.378<br>(0.561)    |
| Malay                   | -0.372<br>(0.613)    |
| Indian                  | 0.014<br>(0.648)     |
| Constant                | 8.135***<br>(1.664)  |
| Observations            | 83                   |
| Adjusted R <sup>2</sup> | 0.536                |

*Note:* \* p<0.05; \*\* p<0.01; \*\*\* p<0.001
