# Supplementary material for: A Mobile Lifestyle Management Program (GlycoLeap) for People With Type 2 Diabetes: Single-Arm Feasibility Study
Source: PubMed Central journal article supplement (PMC6555118; doi:10.2196/12965), 2019-05-24

**Program components**

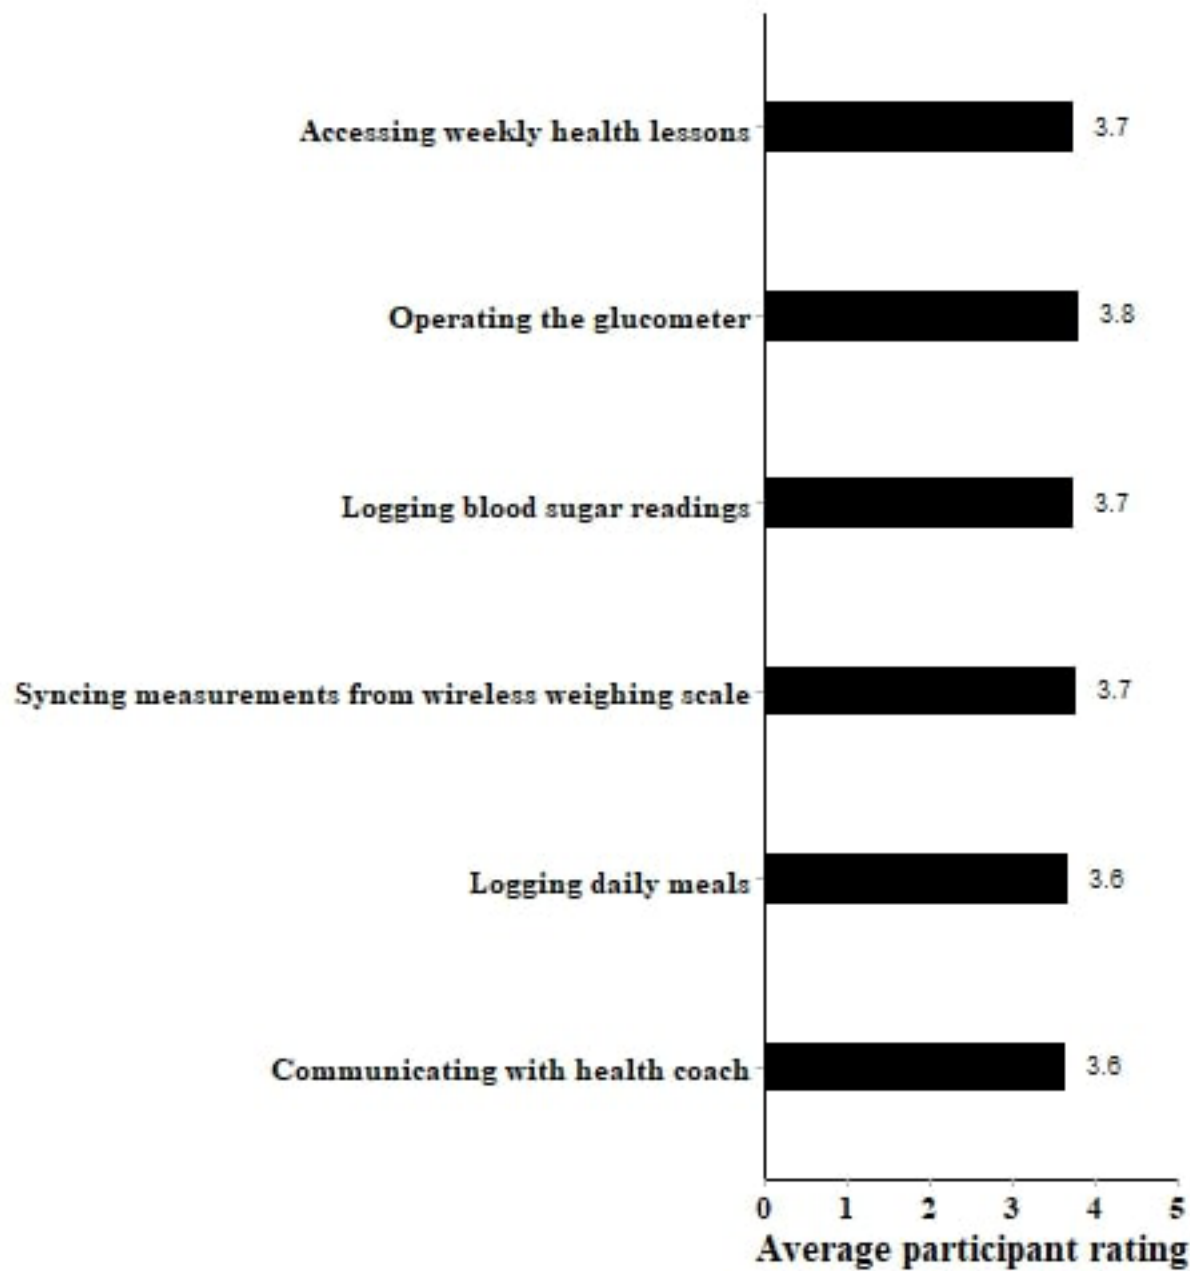

Supplement: mhealth_v7i5e12965_app9.pdf [file mhealth_v7i5e12965_app9.pdf]
